# Supplementary material for: Potential therapeutic use of relaxin in accelerating closure of cranial bone defects in mice
Source: PubMed Central journal article supplement (PMC6545299; doi:10.14814/phy2.14106), 2019-06-02
Supplement: PHY2-7-e14106-s002.pdf [file PHY2-7-e14106-s002.pdf]

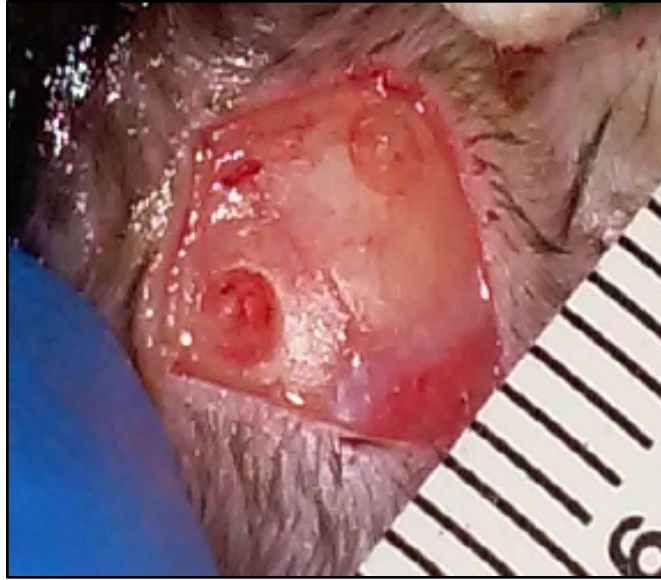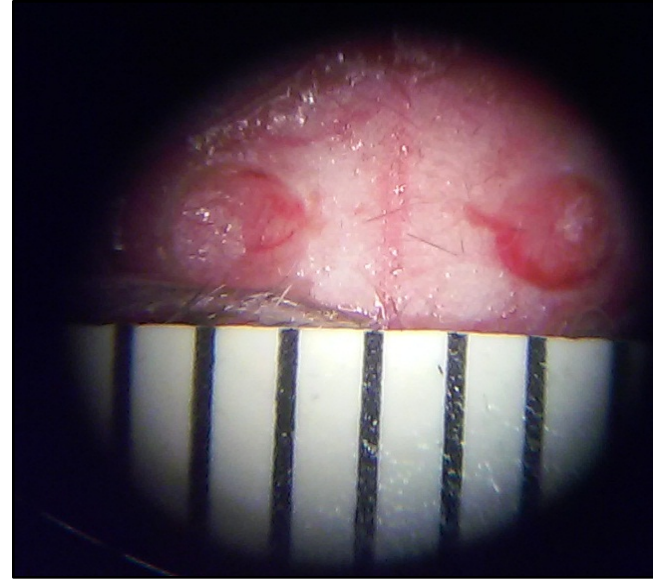

**Figure S2.** Representative Photomicrographs of Bilateral Cranial Lesions
